# Supplementary material for: Association between post-diagnostic use of cholera vaccine and risk of death in prostate cancer patients
Source: PubMed Central journal article supplement (PMC6006429; doi:10.1038/s41467-018-04814-4), 2018-06-18
Supplement: 41467_2018_4814_MOESM1_ESM.pdf [file 41467_2018_4814_MOESM1_ESM.pdf]

**Association between post-diagnostic use of cholera vaccine and risk of death in prostate cancer patients**

**Ji et al**

Supplementary Table 1. Associations of prostate cancer mortality with clinical and demographic characteristics

| Characteristic           | No. patients | No. of person-years | No. of death | IR   | HR   | 95%CI     | P value |
|--------------------------|--------------|---------------------|--------------|------|------|-----------|---------|
| Age at diagnosis         |              |                     |              |      |      |           |         |
| <60                      | 12253        | 59981               | 514          | 8.6  |      | Reference |         |
| 60-64                    | 16192        | 80092               | 762          | 9.5  | 1.11 | 0.99 1.24 | 0.067   |
| 65-69                    | 21255        | 93194               | 1183         | 12.7 | 1.48 | 1.33 1.64 | <.0001  |
| 70+                      | 40283        | 155799              | 6192         | 39.7 | 4.62 | 4.22 5.05 | <.0001  |
| Year at diagnosis        |              |                     |              |      |      |           |         |
| 2005-2009                | 37512        | 248699              | 5741         | 23.1 |      | Reference |         |
| 2010-2014                | 52471        | 140368              | 2910         | 20.7 | 0.81 | 0.77 0.85 | <0.0001 |
| Highest education, years |              |                     |              |      |      |           |         |
| 1-9                      | 30195        | 130632              | 4162         | 31.9 |      | Reference |         |

|                      |       |        |      |      |      |           |      |        |
|----------------------|-------|--------|------|------|------|-----------|------|--------|
| 10-11                | 33915 | 146503 | 2805 | 19.1 | 0.60 | 0.57      | 0.63 | <.0001 |
| 12+                  | 25873 | 111931 | 1684 | 15.0 | 0.46 | 0.43      | 0.48 | <.0001 |
| <b>Birth country</b> |       |        |      |      |      |           |      |        |
| Sweden               | 81974 | 354884 | 7921 | 22.3 |      | Reference |      |        |
| European countries   | 6381  | 27564  | 629  | 22.8 | 1.02 | 0.94      | 1.11 | 0.6033 |
| Others               | 1628  | 6618   | 101  | 15.3 | 0.68 | 0.56      | 0.83 | 0.0001 |
| <b>Income</b>        |       |        |      |      |      |           |      |        |
| Lowest               | 22941 | 94587  | 3245 | 34.3 |      | Reference |      |        |
| Middle-low           | 22357 | 96240  | 2660 | 27.6 | 0.81 | 0.77      | 0.85 | <.0001 |
| Middle-high          | 22342 | 97804  | 1639 | 16.8 | 0.49 | 0.46      | 0.52 | <.0001 |
| Highest              | 22343 | 100435 | 1107 | 11.0 | 0.32 | 0.30      | 0.35 | <.0001 |
| <b>Region</b>        |       |        |      |      |      |           |      |        |
| Big cities           | 42634 | 187666 | 3532 | 18.8 |      | Reference |      |        |
| Southern Sweden      | 29486 | 128057 | 3030 | 23.7 | 1.26 | 1.20      | 1.32 | <.0001 |

|                 |       |       |      |      |      |      |      |        |
|-----------------|-------|-------|------|------|------|------|------|--------|
| Northern Sweden | 17863 | 73343 | 2089 | 28.5 | 1.51 | 1.43 | 1.59 | <.0001 |
|-----------------|-------|-------|------|------|------|------|------|--------|

Stage at diagnosis

|         |       |        |      |       |       |           |       |        |
|---------|-------|--------|------|-------|-------|-----------|-------|--------|
| Stage 1 | 43782 | 203721 | 969  | 4.8   |       | Reference |       |        |
| Stage 2 | 25726 | 114529 | 1584 | 13.8  | 2.92  | 2.70      | 3.17  | <.0001 |
| Stage 3 | 11827 | 47288  | 2071 | 43.8  | 9.34  | 8.66      | 10.08 | <.0001 |
| Stage 4 | 8648  | 23528  | 4027 | 171.2 | 37.70 | 35.13     | 40.46 | <.0001 |

Chronic ischemic heart disease

|     |       |        |      |      |      |           |      |        |
|-----|-------|--------|------|------|------|-----------|------|--------|
| No  | 74741 | 322143 | 6617 | 20.5 |      | Reference |      |        |
| Yes | 15242 | 66924  | 2034 | 30.4 | 1.48 | 1.41      | 1.56 | <.0001 |

Diabetes

|     |       |        |      |      |      |           |      |        |
|-----|-------|--------|------|------|------|-----------|------|--------|
| No  | 82169 | 354080 | 7493 | 21.2 |      | Reference |      |        |
| Yes | 7814  | 34987  | 1158 | 33.1 | 1.57 | 1.47      | 1.67 | <.0001 |

Chronic obstructive pulmonary disease

|     |       |        |      |      |      |           |      |        |  |
|-----|-------|--------|------|------|------|-----------|------|--------|--|
| No  | 85045 | 366882 | 7987 | 21.8 |      | Reference |      |        |  |
| Yes | 4938  | 22185  | 664  | 29.9 | 1.38 | 1.27      | 1.49 | <.0001 |  |

Hypertension

|     |       |        |      |      |      |           |      |        |  |
|-----|-------|--------|------|------|------|-----------|------|--------|--|
| No  | 64595 | 269347 | 5469 | 20.3 |      | Reference |      |        |  |
| Yes | 25388 | 119720 | 3182 | 26.6 | 1.32 | 1.26      | 1.37 | <.0001 |  |

---

Supplementary Table 2. Baseline demographic and clinical characteristics of patients with prostate cancer being vaccinated with cholera vaccine and patients without vaccination and matched by propensity score

| Characteristic    | Users of cholera vaccine |      | Patients without vaccination and matched using propensity score |      | p value |
|-------------------|--------------------------|------|-----------------------------------------------------------------|------|---------|
|                   | No. of patients          | %    | No. of patients                                                 | %    |         |
| Overall           | 831                      | 100  | 2427                                                            | 100  |         |
| Age at diagnosis  |                          |      |                                                                 |      |         |
| <60               | 221                      | 26.6 | 666                                                             | 27.4 | 0.55    |
| 60-64             | 218                      | 26.2 | 652                                                             | 26.9 |         |
| 65-69             | 252                      | 30.3 | 674                                                             | 27.8 |         |
| 70+               | 140                      | 16.8 | 435                                                             | 17.9 |         |
| Median age, years | 64                       |      | 64                                                              |      |         |
| Year at diagnosis |                          |      |                                                                 |      |         |
| 2005-2009         | 619                      | 74.5 | 1817                                                            | 74.9 | 0.83    |
| 2010-2014         | 212                      | 25.5 | 610                                                             | 25.1 |         |

| Median                   | 2008 |      | 2008 |      |      |
|--------------------------|------|------|------|------|------|
| Highest education, years |      |      |      |      |      |
| 1-9                      | 152  | 18.3 | 452  | 18.6 | 0.56 |
| 10-11                    | 298  | 35.9 | 919  | 37.9 |      |
| 12+                      | 381  | 45.8 | 1056 | 43.5 |      |
| Birth country            |      |      |      |      |      |
| Sweden                   | 787  | 94.7 | 2309 | 95.1 | 0.79 |
| European countries       | 36   | 4.3  | 100  | 4.1  |      |
| Others                   | 8    | 1.0  | 18   | 0.7  |      |
| Income                   |      |      |      |      |      |
| Lowest                   | 67   | 8.1  | 204  | 8.4  | 0.12 |
| Middle-low               | 125  | 15.0 | 398  | 16.4 |      |
| Middle-high              | 211  | 25.4 | 691  | 28.5 |      |
| Highest                  | 428  | 51.5 | 1134 | 46.7 |      |

Region

|                 |     |      |      |      |      |
|-----------------|-----|------|------|------|------|
| Big cities      | 447 | 53.8 | 1346 | 55.5 | 0.34 |
| Southern Sweden | 249 | 30.0 | 737  | 30.4 |      |
| Northern Sweden | 135 | 16.2 | 344  | 14.2 |      |

Stage at diagnosis

|         |     |      |      |      |      |
|---------|-----|------|------|------|------|
| Stage 1 | 529 | 63.7 | 1599 | 65.9 | 0.50 |
| Stage 2 | 200 | 24.1 | 573  | 23.6 |      |
| Stage 3 | 67  | 8.1  | 171  | 7.0  |      |
| Stage 4 | 35  | 4.2  | 84   | 3.5  |      |

Chronic ischemic heart disease

|     |     |      |      |      |      |
|-----|-----|------|------|------|------|
| No  | 740 | 89.0 | 2189 | 90.2 | 0.34 |
| Yes | 91  | 11.0 | 238  | 9.8  |      |

Diabetes



|     |     |      |      |      |      |
|-----|-----|------|------|------|------|
| No  | 787 | 94.7 | 2321 | 95.6 | 0.27 |
| Yes | 44  | 5.3  | 106  | 4.4  |      |

Chronic obstructive pulmonary disease

|     |     |      |      |      |      |
|-----|-----|------|------|------|------|
| No  | 809 | 97.4 | 2389 | 98.4 | 0.05 |
| Yes | 22  | 2.6  | 38   | 1.6  |      |

Hypertension

|     |     |      |      |      |      |
|-----|-----|------|------|------|------|
| No  | 628 | 75.6 | 1847 | 76.1 | 0.75 |
| Yes | 203 | 24.4 | 580  | 23.9 |      |

---

Supplementary Table 3. Sensitivity analyses of the adjusted HR between postdiagnostic use of cholera vaccine and the risk of death

| Characteristic         | Cause specific mortality |       |         |         | Overall mortality |       |         |         |
|------------------------|--------------------------|-------|---------|---------|-------------------|-------|---------|---------|
|                        | HR                       | 95%CI | P value |         | HR                | 95%CI | P value |         |
| Sensitivity analysis 1 | 0.46                     | 0.31  | 0.68    | <0.0001 | 0.54              | 0.43  | 0.69    | <0.0001 |
| Sensitivity analysis 2 | 0.50                     | 0.33  | 0.76    | 0.001   | NA                |       |         |         |
| Sensitivity analysis 3 | 0.49                     | 0.31  | 0.74    | 0.001   | 0.53              | 0.39  | 0.71    | <0.0001 |
| Sensitivity analysis 4 | 1.52                     | 1.35  | 1.71    | <0.0001 | 1.46              | 1.36  | 1.57    | <0.0001 |
| Sensitivity analysis 5 | 0.54                     | 0.35  | 0.83    | <0.0001 | 0.53              | 0.39  | 0.70    | <0.0001 |

Sensitivity analysis 1: One year of latency time windows between cholera vaccination and mortality

Sensitivity analysis 2: Fine & Gray competing risk model

Sensitivity analysis 3: Removing patients with prostate cancer who were identified by screening

Sensitivity analysis 4: Patients with prostate cancer who received antimalarial treatment as compared to non-exposed cases

Sensitivity analysis 5: Using patients without vaccination and matched by propensity score as the reference.

Supplementary Table 4. Cross tabulation of exposure to cholera vaccine and antimalarial medications

|                 |     | Antimalarial medication |      |       |       |
|-----------------|-----|-------------------------|------|-------|-------|
|                 |     | Yes                     |      | No    |       |
|                 |     | No.                     | %    | No.   | %     |
| Cholera vaccine | Yes | 90                      | 0.10 | 751   | 0.83  |
|                 | No  | 3549                    | 3.94 | 85593 | 95.12 |

Supplementary Table 5. Test for proportional hazards assumption using cumulative martingale residuals

| Variables                             | P value |
|---------------------------------------|---------|
| Education                             | 0.217   |
| Birth countries                       | 0.285   |
| Clinical stage                        | <.0001  |
| Income                                | 0.002   |
| Region                                | 0.006   |
| Chronic ischemic heart disease        | 0.37    |
| Chronic obstructive pulmonary disease | 0.141   |
| Diabetes                              | 0.399   |
| Hypertension                          | 0.746   |
